# Supplementary material
Source: publisher figshare collection journal article supplement (https://gsapubs.figshare.com/ndownloader/files/22886462)
Supplement: Supplementary file 1 [file 22886462]

## Sheet: Table S1
		Site	Sample	Petrography	Sample zone	Type	δ18OSMOW	2σ		δ13CPDB	2σ
		Eledoi
			EL14	Dunite	EL14 A 4	Inclusion	27.11	0.22		-16.75	0.470014
										-19.66	0.487495
										-21.8	0.482108
					EL14 A 5	Inclusion	28.83	0.23		-13.77	0.493469
										-16.3	0.48293
										-16.75	0.414759
					EL14 B 4	Inclusion	26.65	0.24		-20.28	0.453766
										-19.97	0.458051
										-20.31	0.462453
					EL14 B 5	Inclusion	27.29			-7.99	0.440638
								0.24		-8.62	0.471357
										-9.74	0.467466
					EL14 C 4	Inclusion	24.22			-4.9	0.462053
								0.26		-6.74	0.474999
										-8.82	0.483107
					EL14 C 5	Inclusion	26.21			-5.17	0.443347
										-6.44	0.438877
								0.25		-8.44	0.431978
										-6.72	0.46037
										-8.07	0.476008
			24A4	Lherzolite	24A4 B 3	Inclusion	24.83	0.52		0.55	0.561473
										-0.95	0.611321
										-4.06	0.658216
										-2.95	0.556659
					24A4 B 4	Inclusion	25.12	0.55		-6.24	0.560277
										-3.26	0.576514
										-1.93	0.596612
										-2.96	0.567942
					24A4 D 3	Vein	25.18	0.24		-7.22	0.600333
					24A4 D 4	Vein	26.13	0.25		-7.41	0.546301
										-8.72	0.550443
					24A4 D 5	Vein	24.69	0.25		-4.74	0.570007
					24A4 E 1	Vein	26.69	0.25		-0.62	0.560345
										0.95	0.586445
					24A4 E 2	Vein	25.98	0.24		0.79	0.533686
										1.3	0.570954
			24C4	Wherlite	24C4 A 1	Host lava	20.91	0.26		-12.77	0.523108
					24C4 A 2	Host lava	20.55	0.27		-9.97	0.460251
					24C4 A 3	Host lava	22.56	0.36		-22.26	0.44533
					24C4 A 4	Host lava	19.76	0.24		-8.04	0.452739
					24C4 B 1	Inclusion	23.63	0.23		-7.26	0.425505
					24C4 B 2	Inclusion	23.42	0.25		-9.43	0.443981
		Pelo Hill
			19B	Dunite	19B D 1	Inclusion	24.2	0.24		0.25	0.617805
										-0.18	0.565256
										-1.98	0.545862
					19B D 2	Inclusion	25.41	0.24		-0.12	0.55293
										-0.98	0.56068
		Monduli
			Mon5	Harzburgite	Mon5 1	Inclusion	22.08	0.25		-21.37	0.465166
					Mon5 2	Inclusion	22.5	0.24		-19.47	0.479828
					Mon5 3	Inclusion	23.27	0.24		-18.68	0.491866
					Mon5 4	Inclusion	23.59	0.25		-19.55	0.490887

## Sheet: G47629
Casola, V., et al., 2020, No evidence for carbon enrichment in the mantle source of carbonatites in eastern Africa: Geology, v. 48, https://doi.org/10.1130/G47629.1
